# Supplementary material for: Persistent Hypertension Up to One Year Postpartum among Women with Hypertensive Disorders in Pregnancy in a Low-Resource Setting: A Prospective Cohort Study
Source: PubMed Central journal article supplement (PMC8428291; doi:10.5334/gh.854), 2021-09-09
Supplement: gh-16-1-854-s1.pdf [file gh-16-1-854-s1.pdf]

**SUPPLEMENT TABLE I: Laboratory protocol and standard for public tertiary hospitals in Nigeria**

| <b>S/N</b> | <b>ANALYTE/PARAMETER</b> | <b>ANALYTICAL PRINCIPLE</b>                                               | <b>ANALYSER/EQUIPMENT/PLATFORM</b> |
|------------|--------------------------|---------------------------------------------------------------------------|------------------------------------|
| 1          | Glucose                  | Trinder's Method:<br>Glucose Oxidase                                      | Roche C311 and Abbott C4000        |
| 2          | Sodium                   | Ion Selective<br>Electrode( <b>ISE</b> )                                  | Notek EL 3000                      |
| 3          | Potassium                | ISE                                                                       | Notek EL 3000                      |
| 4          | Chloride                 | ISE                                                                       | Notek EL 3000                      |
| 5          | Bicarbonate              | ISE                                                                       | Notek EL 3000                      |
| 6          | Urea                     | Berthelot's Method:<br>Urease Method                                      | Roche C311 and Abbott C4000        |
| 7          | Creatinine               | Modified Jaffe<br>Kinetic Method                                          | Roche C311 and Abbott C4000        |
| 8          | Uric acid                | Uricase method                                                            | Roche C311 and Abbott C4000        |
| 9          | Serum Total Calcium      | Cresophthalein<br>Complexone                                              | Roche C311 and Abbott C4000        |
| 10         | Inorganic Phosphate      | Ammonium<br>Phosphomolybdate<br>method                                    | Roche C311 and Abbott C4000        |
| 11         | Albumin                  | Bromocresol Green<br>(BCG)                                                | Roche C311 and Abbott C4000        |
| 12         | AST                      | Spectrophotometric<br>measurement of<br>NADH coupled<br>Oxoacid formation | Roche C311 and Abbott C4000        |
| 13         | ALT                      | Spectrophotometric<br>measurement of<br>NADH coupled<br>Oxoacid formation | Roche C311 and Abbott C4000        |
| 14         | ALP                      | Spectrophotometric<br>Using NPP as<br>substrate                           | Roche C311 and Abbott C4000        |
| 15         | Total Bilirubin          | Modified<br>Diazo(Malloy<br>Evelyn) Method                                | Roche C311 and Abbott C4000        |
| 16         | Direct Bilirubin         | Modified<br>Diazo(Malloy<br>Evelyn/Jendrassic<br>Groff) Method            | Roche C311 and Abbott C4000        |

**SUPPLEMENT TABLE II): Distribution of Sociodemographic and Obstetric Characteristic of HPD Clients that Were Followed up versus Loss to Follow up at one Year**

| <b>Variables</b>                          | <b>Followed up to 1 year</b> | <b>Loss to followup at one year</b> |
|-------------------------------------------|------------------------------|-------------------------------------|
| Mean age (SD)                             | 29.8(6.2)                    | 29.1(19.9)                          |
| Mean Gestational age at onset of HDP (SD) | 33(9.9)                      | 33.5(7.3)                           |
| Mean Gestational age at booking (SD)      | 23.4(6.8)                    | 24.3(5.6)                           |
| <i>Category of HDP</i>                    |                              |                                     |
| Chronic Hypertension n(%)                 | 15(7.54)                     | 18(11.1)                            |
| Gestational hypertension n(%)             | 52(26.1)                     | 20(12.4)                            |
| Pre-eclampsia n(%)                        | 107(53.8)                    | 92(56.8)                            |
| Eclampsia n(%)                            | 25(12.6)                     | 32(19.8)                            |
|                                           |                              |                                     |
| Mean BMI at baseline (SD)                 | 29.2(7.9)                    | 28.2(7.5)                           |
| Mean BMI at 1 year (SD)                   | 28.7(7.2)                    | _____                               |
| Mean systolic BP at baseline (SD)         | 158.8(20.8)                  | 161.7(23.3)                         |
| Mean systolic BP at 1 year (SD)           | 133.3(26.6)                  | _____                               |
| Mean diastolic at baseline (SD)           | 137.1(23.4)                  | 135(29.3)                           |
| Mean distolic at 1 year (SD)              | 86.1(18.3)                   | _____                               |
